# Supplementary material
Source: Springer Nature journal article supplement (https://www.springermedizin.de/resource/supplementary/12889_2014_7360_MOESM4_ESM.pdf/9497000)

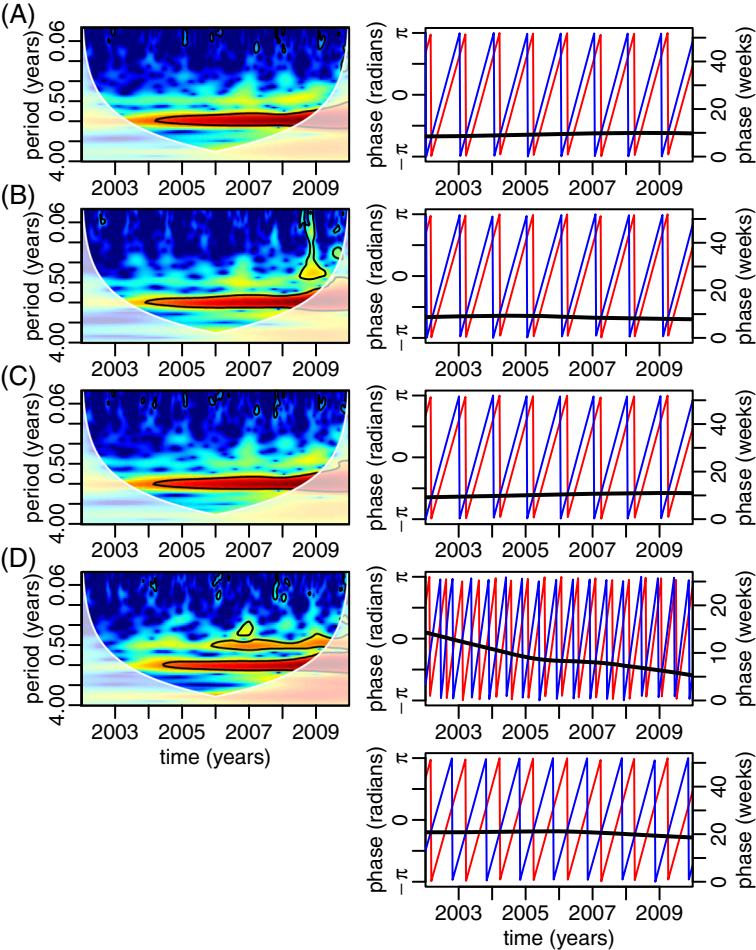

Supplement: MOESM4 [file 9497000]
